# Supplementary material for: Early warning model construction and validation for urinary tract infection in patients with neurogenic lower urinary tract dysfunction (NLUTD): a retrospective study
Source: PeerJ. 2022 May 5;10:e13388. doi: 10.7717/peerj.13388 (PMC9080428; doi:10.7717/peerj.13388)
Supplement: Supplemental Information 1 [file peerj-10-13388-s001.xlsx]

## Sheet: Raw data
	Number	Age	Gender	BMI	Hypertension (1=Yes, 0=No)	Diabetes (1=Yes, 0=No)	Urinary calculi(1=Yes, 0=No)	Neurogenic bladder type(1=Detrusor hyperreflexia, 2=Detrusor non-reflex type, 3= Hybrid)	Catheterization method(1=Indwelling catheterization,0=Intermittent catheterization)	Preventive use of antibacterial drugs (1=Yes, 0=No)	Bladder behavior training intervention time (1》2 weeks，0<2 weeks）	Hypoproteinemia (1=Yes, 0=No)	serum creatinine（normal range 44-133umol/L）	Serum total bilirubin（Normal range 1.7-21μmol/L）	Diagnosis (Spinal cord injury =1, Cerebrovascular accident/ brain tumor/stroke=2, Peripheral neuropathy (such as diabetes =3) )
Non-urinary tract infection group	1	42	female	25.8942	0	1	1	2	0	0	1	0	81.053	9.021	1
Non-urinary tract infection group	2	36	male	24.4583	1	0	1	2	0	0	0	0	132.706	8.48586	1
Non-urinary tract infection group	3	37	female	25.8346	0	0	1	2	0	0	0	0	194.481	11.0595	1
Non-urinary tract infection group	4	63	female	21.7502	0	1	0	3	1	0	0	1	107.308	19.8849	2
Non-urinary tract infection group	5	50	female	22.6757	0	0	0	2	0	0	1	0	110.111	11.6849	1
Urinary tract infection group	6	62	male	20.2024	0	0	0	2	0	1	1	0	124.575	12.3851	1
Urinary tract infection group	7	39	male	19.9117	0	0	0	2	1	1	1	0	56.6657	9.56033	1
Non-urinary tract infection group	8	79	male	23.6203	1	0	0	2	0	0	1	0	83.7397	8.51997	1
Non-urinary tract infection group	9	40	female	20.89	0	1	1	1	0	1	0	0	56.2041	15.4465	2
Non-urinary tract infection group	10	51	female	18.1228	1	0	0	2	0	0	1	0	88.7477	9.84919	1
Non-urinary tract infection group	11	75	male	19.6484	1	0	0	2	0	0	1	1	220.247	13.2435	1
Non-urinary tract infection group	12	67	male	21.0478	1	0	0	2	0	1	0	0	151.686	9.60219	2
Non-urinary tract infection group	13	70	male	21.9805	0	0	0	2	0	1	0	0	62.4794	15.4922	1
Non-urinary tract infection group	14	40	male	25.3791	1	0	0	2	0	1	1	0	90.9128	7.18115	1
Urinary tract infection group	15	73	female	19.7833	0	1	1	2	0	1	0	0	262.491	14.4322	1
Non-urinary tract infection group	16	66	male	22.5083	1	0	0	3	0	0	0	0	229.137	6.23941	2
Non-urinary tract infection group	17	65	male	20.5514	1	0	0	2	0	1	0	0	103.829	8.96394	1
Non-urinary tract infection group	18	75	male	23.7636	1	0	0	2	0	1	0	0	172.654	10.342	1
Urinary tract infection group	19	69	male	24.5144	1	1	0	2	0	0	1	0	203.06	12.34	1
Urinary tract infection group	20	77	female	20.4291	0	0	1	2	1	0	1	1	106.107	18.8181	1
Urinary tract infection group	21	81	female	22.0419	0	0	1	2	1	1	1	0	270.775	4.25923	1
Non-urinary tract infection group	22	74	male	19.2726	1	0	0	2	0	1	0	0	217.076	6.95033	2
Non-urinary tract infection group	23	55	female	26.2728	0	1	1	2	0	0	1	0	44.2487	14.7526	1
Non-urinary tract infection group	24	60	female	21.2942	0	0	0	2	1	1	1	0	213.644	16.4789	3
Non-urinary tract infection group	25	72	male	20.0141	1	0	0	2	0	0	1	1	178.159	8.55804	1
Non-urinary tract infection group	26	41	female	20.3234	1	0	1	3	0	0	0	0	72.4658	12.0569	2
Non-urinary tract infection group	27	50	female	19.9681	0	1	1	3	0	0	0	0	117.302	15.244	1
Urinary tract infection group	28	65	female	22.5209	0	0	1	1	1	1	1	0	86.2831	16.967	1
Non-urinary tract infection group	29	48	male	24.7072	1	0	1	2	1	1	0	0	105.373	12.1487	1
Non-urinary tract infection group	30	35	male	25.1423	1	1	0	2	1	0	1	0	183.462	9.98896	3
Urinary tract infection group	31	73	female	29.7644	1	1	0	3	1	1	1	1	78.2176	13.0838	1
Urinary tract infection group	32	69	female	33.3084	1	1	0	1	1	1	0	1	140.33	29.3151	1
Non-urinary tract infection group	33	77	male	19.2487	1	0	0	2	1	1	1	0	66.0423	11.0668	1
Non-urinary tract infection group	34	44	female	20.7951	0	0	0	2	0	1	1	0	172.619	24.5273	2
Non-urinary tract infection group	35	43	female	30.4477	0	1	1	2	1	1	0	0	216.246	13.531	2
Urinary tract infection group	36	54	male	20.589	1	1	0	2	1	1	0	0	258.018	17.6661	1
Non-urinary tract infection group	37	56	male	24.299	1	1	1	2	0	1	0	0	114.7	19.5353	1
Non-urinary tract infection group	38	78	male	20.7297	0	0	0	2	1	1	0	0	115.149	12.1762	2
Urinary tract infection group	39	75	male	26.0671	1	1	0	2	1	1	1	1	264.143	19.0989	1
Non-urinary tract infection group	40	40	male	26.759	1	1	0	2	0	1	1	0	61.1426	13.3886	1
Non-urinary tract infection group	41	66	male	18.3023	1	0	0	2	0	1	1	0	208.053	13.2854	2
Non-urinary tract infection group	42	73	male	18.9797	1	0	0	2	0	0	0	0	170.285	11.5268	1
Non-urinary tract infection group	43	67	male	21.797	1	0	0	2	0	1	1	0	164.748	26.1462	1
Non-urinary tract infection group	44	70	male	21.8843	1	0	0	2	0	0	1	0	223.741	2.88962	3
Urinary tract infection group	45	80	female	30.4724	1	1	0	3	1	1	1	1	211.315	27.6313	1
Non-urinary tract infection group	46	73	male	21.197	1	0	0	2	0	1	1	0	125.385	19.1184	1
Urinary tract infection group	47	72	female	27.8046	0	0	1	2	1	1	1	0	106.958	12.5541	1
Non-urinary tract infection group	48	61	female	20.1371	0	1	1	2	0	1	0	0	51.4556	7.3365	1
Non-urinary tract infection group	49	47	male	27.1256	1	1	0	2	1	0	1	0	211.552	7.48672	1
Non-urinary tract infection group	50	50	male	24.6796	1	1	0	1	0	1	1	0	91.7518	9.04374	1
Non-urinary tract infection group	51	70	male	19.9697	1	0	0	2	0	0	0	0	176.464	15.0756	3
Non-urinary tract infection group	52	59	male	24.6935	1	1	1	2	0	0	0	0	83.429	14.4639	1
Urinary tract infection group	53	68	male	30.8865	1	0	0	3	0	0	0	1	215.08	20.2582	1
Urinary tract infection group	54	79	female	32.5454	1	1	1	3	1	1	1	0	171.642	16.9514	1
Non-urinary tract infection group	55	61	female	32.0753	0	1	0	1	1	1	1	0	111.779	8.65017	1
Non-urinary tract infection group	56	41	female	23.5321	0	1	0	2	0	0	0	1	103.783	3.88588	1
Non-urinary tract infection group	57	67	male	23.2568	0	0	0	2	1	1	0	0	107.929	15.5525	1
Non-urinary tract infection group	58	54	female	21.5007	0	1	1	2	1	1	0	0	119.044	8.04424	1
Non-urinary tract infection group	59	71	male	22.0191	0	0	0	2	0	1	1	0	67.6947	13.5431	1
Non-urinary tract infection group	60	66	male	19.3171	1	0	0	2	0	0	0	0	212.532	12.4945	1
Urinary tract infection group	61	69	female	29.735	1	1	1	2	1	0	1	1	211.81	8.67158	1
Non-urinary tract infection group	62	38	female	24.4856	0	0	0	3	0	1	0	1	203.215	13.9299	1
Non-urinary tract infection group	63	47	female	23.6394	0	0	0	3	0	1	0	0	185.535	20.6965	1
Non-urinary tract infection group	64	69	male	21.2847	1	0	0	1	0	1	1	0	172.272	8.42846	3
Non-urinary tract infection group	65	65	male	22.8419	1	0	0	2	1	1	1	0	94.3807	4.5316	1
Non-urinary tract infection group	66	65	male	19.8153	0	0	0	3	0	1	0	0	85.0703	13.1511	1
Urinary tract infection group	67	76	female	20.3034	0	1	0	3	1	1	0	1	63.0526	7.63903	1
Non-urinary tract infection group	68	70	male	21.4498	0	0	0	2	0	1	1	0	90.9223	9.61286	1
Non-urinary tract infection group	69	60	female	19.9612	0	0	1	3	0	0	0	1	73.7685	5.21522	2
Non-urinary tract infection group	70	46	female	23.2478	0	0	1	1	0	0	0	0	91.0902	5.48325	2
Non-urinary tract infection group	71	73	male	22.3255	1	0	0	2	0	1	0	0	97.6968	8.39233	2
Urinary tract infection group	72	81	female	21.4377	0	0	1	2	0	0	1	0	115.578	3.67702	1
Non-urinary tract infection group	73	64	female	18.8053	0	0	0	2	0	1	1	0	205.59	8	1
Non-urinary tract infection group	74	61	male	25.006	1	1	1	2	1	1	0	0	129.565	13.7726	1
Non-urinary tract infection group	75	73	male	19.6836	1	0	0	1	0	0	1	0	79.3377	13.0578	1
Non-urinary tract infection group	76	47	female	22.334	0	1	1	2	1	1	0	0	85.1111	8.48164	1
Urinary tract infection group	77	63	male	19.8336	0	0	0	2	1	1	1	0	76.7734	8.07596	2
Non-urinary tract infection group	78	60	female	32.6003	0	0	0	1	0	0	0	0	204.828	5.19044	1
Non-urinary tract infection group	79	79	male	21.9	1	0	0	3	0	0	0	0	193.88	5.72823	3
Non-urinary tract infection group	80	78	male	23.6493	1	0	0	2	0	0	0	0	215.686	19.2752	1
Non-urinary tract infection group	81	76	male	18.207	1	0	0	3	1	1	0	1	230.836	18.246	1
Non-urinary tract infection group	82	55	male	25.9001	1	1	0	2	1	1	1	0	125.435	7.02243	1
Non-urinary tract infection group	83	75	male	21.7577	1	0	0	2	0	1	0	1	87.7947	4.34245	1
Non-urinary tract infection group	84	42	male	26.2087	1	1	0	2	1	1	1	0	92.7716	16.0293	1
Non-urinary tract infection group	85	70	male	21.4255	1	0	0	2	0	1	0	0	235.133	6.58824	1
Urinary tract infection group	86	82	female	28.8803	1	1	1	2	1	0	1	1	204.941	17.4331	2
Non-urinary tract infection group	87	79	male	23.9035	0	0	0	3	0	1	0	1	73.9478	20.7205	1
Urinary tract infection group	88	70	male	27.787	1	0	0	3	0	0	0	0	286.392	28.034	1
Non-urinary tract infection group	89	79	male	18.0891	1	0	0	2	1	0	1	0	81.9259	9.81777	1
Non-urinary tract infection group	90	49	female	21.4328	1	0	0	2	0	0	1	0	70.879	14.7605	1
Non-urinary tract infection group	91	35	female	26.3998	0	1	1	3	0	0	1	0	94.4013	4.39392	1
Non-urinary tract infection group	92	65	male	22.387	1	0	0	2	0	1	1	0	162.754	18.6652	1
Non-urinary tract infection group	93	72	male	18.2289	1	0	0	3	0	0	0	0	235.021	14.4791	1
Non-urinary tract infection group	94	77	male	19.8892	1	0	0	1	0	1	1	0	162.071	4.67465	2
Non-urinary tract infection group	95	47	male	24.4215	1	0	1	2	0	0	0	0	104.187	16.37	1
Non-urinary tract infection group	96	37	male	24.3981	1	1	1	1	0	0	1	0	111.082	8.70559	1
Non-urinary tract infection group	97	57	male	27.9658	1	1	0	2	1	1	1	0	88.0242	3.19479	1
Non-urinary tract infection group	98	69	male	19.4867	0	0	0	2	1	1	0	1	54.963	18.7906	1
Non-urinary tract infection group	99	78	male	19.797	1	0	0	1	0	0	1	0	58.7728	6.62728	1
Non-urinary tract infection group	100	40	female	20.4549	0	1	0	3	1	0	0	0	132.736	8.18553	1
Non-urinary tract infection group	101	52	female	25.0192	0	0	1	2	0	0	0	0	169.701	16.1335	3
Non-urinary tract infection group	102	61	male	27.1361	1	1	1	2	0	0	0	0	107.585	6.0106	1
Urinary tract infection group	103	74	female	18.9342	0	0	1	2	0	0	1	0	103.585	4.6442	1
Non-urinary tract infection group	104	54	female	27.0253	0	1	1	3	0	1	1	1	96.9293	4.38577	2
Non-urinary tract infection group	105	70	male	20.6043	1	0	0	3	1	0	0	0	237.467	5.05296	1
Urinary tract infection group	106	76	female	19.6626	0	0	1	2	1	1	1	0	89.4842	4.54618	1
Non-urinary tract infection group	107	61	female	30.1489	0	1	1	2	0	0	0	0	172.503	6.49311	1
Urinary tract infection group	108	72	female	23.6394	0	1	0	3	0	1	1	1	128.372	4.97969	1
Urinary tract infection group	109	88	female	21.2641	0	0	0	1	1	1	1	0	81.0568	12.5384	1
Urinary tract infection group	110	74	male	24.2704	1	1	0	2	1	1	1	1	221.584	12.8583	1
Non-urinary tract infection group	111	37	male	25.103	1	1	0	2	1	0	1	0	234.902	13.6166	1
Non-urinary tract infection group	112	74	male	21.9029	0	0	0	3	0	1	0	0	65.5146	18.1011	1
Non-urinary tract infection group	113	41	female	30.0339	0	0	0	1	0	0	0	0	226.793	15.3886	3
Urinary tract infection group	114	70	male	28.158	1	0	0	3	0	0	0	0	255.681	13.1682	1
Urinary tract infection group	115	71	male	33.1297	1	0	1	1	0	0	0	1	279.394	19.9954	1
Non-urinary tract infection group	116	37	male	29.6945	1	1	0	2	0	0	1	0	194.987	7.68349	1
Urinary tract infection group	117	66	female	18.079	0	1	1	3	1	1	0	0	77.2785	11.9652	1
Non-urinary tract infection group	118	77	male	22.6203	1	0	0	3	1	0	0	0	235.87	16.8672	1
Non-urinary tract infection group	119	66	male	20.4571	1	0	0	2	0	0	1	0	60.274	3.35665	2
Non-urinary tract infection group	120	70	male	20.3199	1	0	0	1	0	1	1	0	152.263	8.36027	1
Urinary tract infection group	121	64	male	18.083	0	0	0	2	0	1	0	0	132.692	2.77374	2
Non-urinary tract infection group	122	51	female	28.5866	0	0	1	1	0	0	0	0	236.295	7.27552	1
Non-urinary tract infection group	123	53	female	30.6058	0	0	0	2	0	0	0	1	206.672	16.9595	1
Non-urinary tract infection group	124	66	male	21.7235	1	0	0	2	0	1	0	0	100.403	20.9526	1
Urinary tract infection group	125	44	male	22.6938	0	0	0	2	1	1	1	0	45.4356	12.2948	3
Non-urinary tract infection group	126	42	male	24.0557	1	0	1	2	0	0	0	0	45.5054	20.2092	2
Non-urinary tract infection group	127	72	male	20.2297	0	0	0	2	0	1	0	1	121.85	5.6149	1
Non-urinary tract infection group	128	63	female	19.2586	0	1	1	2	1	1	0	0	72.5811	6.04159	1
Non-urinary tract infection group	129	49	female	21.4585	1	0	1	3	0	0	0	0	61.5654	13.7873	1
Non-urinary tract infection group	130	75	male	20.6022	0	0	0	3	1	1	0	0	69.4895	15.3719	3
Non-urinary tract infection group	131	36	female	31.8688	0	1	0	1	1	0	1	0	118.478	8.61376	1
Non-urinary tract infection group	132	42	male	26.944	1	1	1	2	0	0	0	0	56.0944	20.2101	1
Non-urinary tract infection group	133	50	female	31.4047	0	1	0	1	1	0	1	0	56.8843	7.0381	1
Non-urinary tract infection group	134	78	male	21.3194	1	0	0	2	0	1	0	0	128.521	14.519	1
Non-urinary tract infection group	135	61	female	19.2977	0	0	1	1	0	1	0	0	64.4903	2.21308	1
Non-urinary tract infection group	136	35	female	20.8347	0	0	0	2	1	1	1	0	205.395	17.2901	1
Non-urinary tract infection group	137	77	male	19.5272	1	0	0	2	0	1	0	1	59.7498	17.9538	1
Non-urinary tract infection group	138	66	male	23.9579	1	0	0	2	1	1	0	0	162.577	4.06396	2
Urinary tract infection group	139	71	female	21.1577	0	1	0	3	0	0	1	1	73.2208	13.4839	2
Urinary tract infection group	140	57	male	19.9191	0	0	0	2	1	1	1	0	129.918	13.6591	1
Non-urinary tract infection group	141	65	male	22.0711	0	0	0	3	0	1	0	0	91.1369	10.3285	1
Non-urinary tract infection group	142	35	female	22.2868	0	0	0	2	1	1	1	0	186.805	10.206	1
Urinary tract infection group	143	35	male	19.2506	1	1	0	2	1	1	0	0	267.315	12.568	1
Urinary tract infection group	144	64	male	22.7305	0	0	0	2	1	1	1	0	124.461	11.5039	2
Urinary tract infection group	145	85	female	21.6733	0	1	0	1	0	1	1	0	76.9641	20.3489	3
Non-urinary tract infection group	146	74	male	23.4914	0	0	0	2	0	1	0	1	53.1392	30.3504	1
Urinary tract infection group	147	73	female	22.1863	0	1	0	2	0	1	1	0	270.736	8.04536	1
Non-urinary tract infection group	148	69	male	23.6499	0	0	0	2	1	1	0	0	132.581	17.7912	2
Urinary tract infection group	149	72	male	19.2819	1	0	1	2	0	1	0	0	236.788	23.9593	2
Non-urinary tract infection group	150	49	female	21.6714	0	1	1	2	0	0	0	0	119.578	5.42035	2
Non-urinary tract infection group	151	65	male	21.1409	0	0	0	2	0	1	0	0	109.483	5.28303	2
Non-urinary tract infection group	152	78	male	20.1122	1	0	0	3	0	1	1	0	96.0636	20.725	1
Non-urinary tract infection group	153	55	female	22.634	0	0	1	2	0	0	0	1	124.227	15.5681	1
Urinary tract infection group	154	66	female	26.3383	1	1	0	3	0	1	1	0	174.251	21.1267	2
Non-urinary tract infection group	155	40	female	33.6777	0	1	1	3	0	0	1	1	63.4448	10.6555	3
Non-urinary tract infection group	156	73	male	20.8745	0	0	0	2	0	1	0	0	88.0429	10.2935	1
Urinary tract infection group	157	67	male	33.6213	1	0	1	2	1	1	1	0	244.781	10.8849	1
Non-urinary tract infection group	158	73	male	18.9635	1	0	0	2	1	1	0	1	238.65	7.0916	1
Urinary tract infection group	159	52	male	23.2842	1	1	0	2	0	1	0	0	286.543	5.31259	1
Non-urinary tract infection group	160	72	male	21.07	1	0	0	2	1	1	0	0	155.129	14.7032	1
Non-urinary tract infection group	161	41	male	25.4847	1	1	0	3	0	0	1	1	91.2188	10.9594	3
Urinary tract infection group	162	59	male	22.5126	1	1	0	2	0	1	1	0	104.336	4.97818	1
Non-urinary tract infection group	163	63	female	23.1264	0	0	0	2	0	0	1	0	53.9706	5.23512	1
Non-urinary tract infection group	164	69	male	21.2434	1	0	0	3	0	1	1	0	49.2947	11.2006	1
Urinary tract infection group	165	85	female	23.3606	0	0	0	2	1	0	0	1	106.493	17.5001	1
Non-urinary tract infection group	166	39	female	29.2224	0	1	1	2	1	1	1	0	184.98	10.7382	1
Non-urinary tract infection group	167	73	male	19.4315	1	0	0	1	1	1	1	0	49.1558	8.19998	1
Urinary tract infection group	168	48	male	23.7122	0	0	0	2	0	0	1	0	48.8335	13.4544	1
Non-urinary tract infection group	169	78	male	20.8031	1	0	0	2	0	1	0	0	84.8338	20.623	3
Non-urinary tract infection group	170	67	male	20.9127	0	0	0	2	0	1	0	1	76.7163	3.02922	1
Urinary tract infection group	171	60	male	18.9932	0	0	0	2	0	0	1	0	92.6621	12.3357	1
Urinary tract infection group	172	44	male	23.1291	0	0	0	2	0	0	1	0	114.63	14.1228	2
Urinary tract infection group	173	75	male	27.4517	1	0	1	2	0	1	0	1	261.914	11.9997	1
Non-urinary tract infection group	174	72	male	21.565	1	0	0	2	0	1	0	1	52.955	19.5018	1
Non-urinary tract infection group	175	56	female	30.5636	0	1	1	2	1	1	0	0	163.556	19.0754	3
Non-urinary tract infection group	176	59	male	29.5132	1	1	1	3	0	0	1	1	44.6193	4.97655	1
Non-urinary tract infection group	177	74	male	18.3216	0	0	0	3	0	1	0	0	92.7744	6.17564	1
Non-urinary tract infection group	178	53	male	24.0649	1	1	0	1	0	1	1	0	66.8554	14.5912	1
Non-urinary tract infection group	179	52	female	26.025	0	1	1	2	0	0	1	0	79.654	9.6715	3
Urinary tract infection group	180	67	female	22.1587	0	1	1	2	0	0	0	0	68.9165	6.17809	1
Non-urinary tract infection group	181	45	female	22.3068	0	0	0	3	0	1	1	0	202.32	2.87991	1
Non-urinary tract infection group	182	79	male	23.1759	0	0	0	2	0	1	0	0	131.755	29.8499	3
Non-urinary tract infection group	183	77	male	28.9113	1	1	0	2	0	0	1	0	224.219	6.03136	1
Urinary tract infection group	184	73	female	28.7368	1	1	1	2	0	0	1	0	167.804	5.74427	3
Non-urinary tract infection group	185	69	male	20.8636	1	0	0	2	0	0	0	0	161.496	14.0659	1
Non-urinary tract infection group	186	76	male	18.1059	0	0	0	2	0	1	1	0	68.287	12.4406	1
Non-urinary tract infection group	187	46	female	19.9035	0	0	0	2	0	1	1	0	172.812	20	3
Non-urinary tract infection group	188	70	male	23.9643	1	0	0	2	1	0	1	0	77.064	22.5092	1
Urinary tract infection group	189	78	female	22.416	0	0	0	2	1	1	0	0	117.915	14.2013	2
Non-urinary tract infection group	190	79	male	21.4277	1	0	0	2	0	1	1	0	222.739	6.88885	1
Non-urinary tract infection group	191	76	male	19.0331	1	0	0	2	1	0	1	0	87.9016	21.2849	1
Urinary tract infection group	192	65	female	20.3806	0	0	0	2	1	1	1	0	115.213	5.56551	3
Urinary tract infection group	193	80	female	20.8586	0	0	1	2	0	0	1	1	90.2021	18.8929	2
Urinary tract infection group	194	59	male	23.8055	0	0	0	2	1	1	1	0	130.582	10.0153	3
Urinary tract infection group	195	87	female	30.9378	1	1	1	3	1	1	1	1	166.805	5.77463	2
Non-urinary tract infection group	196	64	male	26.5219	1	1	1	3	0	1	0	0	106.216	4.19858	1
Urinary tract infection group	197	59	male	18.9698	0	0	0	2	0	1	1	0	73.0249	17.6844	3
Non-urinary tract infection group	198	77	male	19.5165	0	0	0	2	0	1	1	0	78.0955	10.4782	3
Urinary tract infection group	199	57	male	28.3978	1	1	0	2	0	0	0	0	207.037	17.7113	2
Non-urinary tract infection group	200	69	male	19.8007	0	0	0	2	1	1	0	1	84.5871	12.3834	1
Urinary tract infection group	201	86	female	22.7968	0	1	1	3	1	1	0	0	72.887	10.5899	1
Urinary tract infection group	202	66	female	20.8885	0	1	1	3	1	1	0	0	57.4232	20.996	1
Urinary tract infection group	203	74	female	27.5849	1	1	1	3	1	1	0	0	126.851	5.45129	1
Urinary tract infection group	204	51	male	33.8439	1	1	0	2	0	0	0	0	217.389	6.59202	1
Non-urinary tract infection group	205	56	female	21.7254	0	0	0	2	0	1	1	0	172.249	18.5313	1
Non-urinary tract infection group	206	79	male	19.1327	1	0	0	2	0	1	0	1	109.693	19.4213	3
External validation dataset
	Number	Age	Gender	BMI	Hypertension (1=Yes, 0=No)	Diabetes (1=Yes, 0=No)	Urinary calculi(1=Yes, 0=No)	Neurogenic bladder type(1=Detrusor hyperreflexia, 2=Detrusor non-reflex type, 3= Hybrid)	Catheterization method(1=Indwelling catheterization,0=Intermittent catheterization)	Preventive use of antibacterial drugs (1=Yes, 0=No)	Bladder behavior training intervention time (1》2 weeks，0<2 weeks）	Hypoproteinemia (1=Yes, 0=No)	serum creatinine（normal range 44-133umol/L）	Serum total bilirubin（Normal range 1.7-21μmol/L）
Urinary tract infection group	1	46	female	22.1587	1	1	1	3	0	0	0	0	1	1	1
Urinary tract infection group	2	55	male	22.3068	0	0	1	2	0	1	0	1	0	1	2
Urinary tract infection group	3	20	female	23.1759	1	1	1	1	1	1	0	0	0	0	1
Urinary tract infection group	4	53	female	28.9113	0	1	0	1	0	0	1	1	1	0	1
Urinary tract infection group	5	39	female	28.7368	0	0	0	1	1	1	1	1	0	0	2
Urinary tract infection group	6	51	female	20.8636	1	1	1	2	1	0	0	1	1	1	1
Urinary tract infection group	7	55	male	18.1059	0	1	1	2	1	1	0	0	0	0	1
Urinary tract infection group	8	44	female	19.9035	1	0	1	3	1	1	0	1	0	0	1
Non-urinary tract infection group	9	49	female	23.9643	0	0	1	3	1	0	0	1	0	1	1
Non-urinary tract infection group	10	76	male	22.416	0	0	0	2	1	1	1	0	1	0	2
Non-urinary tract infection group	11	63	male	21.4277	0	0	1	2	0	1	1	1	1	1	1
Non-urinary tract infection group	12	62	male	19.0331	1	1	1	1	1	0	0	1	1	0	3
Non-urinary tract infection group	13	86	male	20.3806	1	1	0	1	1	1	1	0	1	1	1
Non-urinary tract infection group	14	51	male	20.8586	0	1	0	1	0	0	0	1	0	0	1
Non-urinary tract infection group	15	41	male	23.8055	1	0	0	2	0	1	1	1	0	1	3
Non-urinary tract infection group	16	29	female	30.9378	0	1	1	2	0	0	0	0	1	0	1
Non-urinary tract infection group	17	33	male	19.9035	1	0	0	3	0	1	0	1	0	1	1
Non-urinary tract infection group	18	39	female	23.9643	0	1	1	3	1	1	1	0	1	0	2
Non-urinary tract infection group	19	49	male	22.416	0	1	1	3	1	0	0	1	0	0	1
Non-urinary tract infection group	20	47	male	21.4277	0	1	0	2	1	1	1	1	1	1	1
Non-urinary tract infection group	21	43	female	19.0331	0	0	0	2	1	0	0	0	1	0	3
Non-urinary tract infection group	22	66	male	20.3806	1	0	0	2	0	1	0	1	0	1	1
Non-urinary tract infection group	23	63	male	20.8586	1	0	1	1	0	0	1	1	0	1	1
Non-urinary tract infection group	24	39	male	23.8055	1	0	0	2	0	1	0	0	1	0	2
Non-urinary tract infection group	25	60	male	23.1759	0	0	1	1	0	1	1	1	0	1	1
Non-urinary tract infection group	26	37	male	28.9113	0	1	1	1	0	0	0	0	1	0	2
Non-urinary tract infection group	27	47	female	28.7368	0	0	0	3	0	1	0	1	0	0	1
Non-urinary tract infection group	28	42	male	20.8636	1	1	0	2	1	0	1	1	0	1	1
Non-urinary tract infection group	29	47	male	18.1059	1	0	0	1	1	1	0	0	1	0	1
Non-urinary tract infection group	30	50	male	19.9035	1	1	1	3	1	0	1	1	1	1	1
